# Supplementary material for: Metabolic analysis of kiwifruit (Actinidia deliciosa) berries from extreme genotypes reveals hallmarks for fruit starch metabolism
Source: PubMed Central journal article supplement (PMC3830485; doi:10.1093/jxb/ert293), 2013-09-21
Supplement: supp_ert293_jexbot102772_file001.pdf [file supp_ert293_jexbot102772_file001.pdf]

**Metabolic analysis of kiwifruit (*Actinidia deliciosa*) berries from extreme genotypes reveals hallmarks for fruit starch metabolism**

*Simona Nardoza, Helen L. Bolding, Sonia Osorio, Melanie Höhne, Mark Wohlers, Andrew P. Gleave, Elspeth A. MacRae, Annette C. Richardson, Ross G. Atkinson, Ronan Sulpice, Alisdair R. Fernie, Michael J. Clearwater*

**Supplementary Data**

## SUPPLEMENTARY TABLES

**Supplementary Table S1. List of *Actinidia deliciosa* fruit sample types involved in the present study. CHO, carbohydrates; E, enzyme activities; HY, harvest year; M, metabolites; PM, physical measurements; T, transcripts. Bold font: genotypes more deeply characterised in 2009. \*, data sourced from Nardozza et al. (2010).**

| Genotype ID | Starch class | Size class | Year of selection | SAMPLING |      |      |   |      |     |   |   |   |   |   |
|-------------|--------------|------------|-------------------|----------|------|------|---|------|-----|---|---|---|---|---|
|             |              |            |                   | 2005     |      | 2007 |   | 2009 |     |   |   |   |   |   |
|             |              |            |                   | HY       | CHO* | PM*  | T | PM   | CHO | M | E | T |   |   |
| 1           | Low          | Large      | 2003              | ✓        | ✓    | ✓    | ✓ |      |     |   |   |   |   |   |
| <b>3</b>    | High         | Large      | 2003              | ✓        | ✓    | ✓    | ✓ | ✓    | ✓   | ✓ | ✓ | ✓ | ✓ | ✓ |
| 5           | High         | Large      | 2003              | ✓        | ✓    | ✓    | ✓ |      |     |   |   |   |   |   |
| <b>17</b>   | Low          | Small      | 2003              | ✓        | ✓    | ✓    | ✓ | ✓    | ✓   | ✓ | ✓ | ✓ | ✓ | ✓ |
| <b>25</b>   | Low          | Large      | 2004              | ✓        | ✓    | ✓    | ✓ | ✓    | ✓   | ✓ | ✓ | ✓ | ✓ | ✓ |
| 26          | Low          | Large      | 2004              | ✓        | ✓    | ✓    | ✓ |      |     |   |   |   |   |   |
| 27          | Low          | Small      | 2004              | ✓        | ✓    | ✓    | ✓ |      |     |   |   |   |   |   |
| 28          | High         | Large      | 2004              | ✓        | ✓    | ✓    | ✓ |      |     |   |   |   |   |   |
| 29          | High         | Small      | 2004              | ✓        | ✓    | ✓    | ✓ |      |     |   |   |   |   |   |
| <b>30</b>   | High         | Small      | 2004              | ✓        | ✓    | ✓    | ✓ | ✓    | ✓   | ✓ | ✓ | ✓ | ✓ | ✓ |

**Supplementary Table S2. List of *Actinidia deliciosa* fruit samples included in the redundancy analysis. Ten genotypes were considered (five high-starch, sample 1 to 20, and five low-starch, sample 21 to 40), and whole fruit tissue was collected in 2007 at four different fruit ages. DAA, days after anthesis.**

| sample number | genotype | fruit age (DAA) |
|---------------|----------|-----------------|
| 1             | 3        | 28              |
| 2             | 3        | 56              |
| 3             | 3        | 98              |
| 4             | 3        | 154             |
| 5             | 5        | 28              |
| 6             | 5        | 56              |
| 7             | 5        | 98              |
| 8             | 5        | 154             |
| 9             | 28       | 28              |
| 10            | 28       | 56              |
| 11            | 28       | 98              |
| 12            | 28       | 154             |
| 13            | 29       | 28              |
| 14            | 29       | 56              |
| 15            | 29       | 98              |
| 16            | 29       | 154             |
| 17            | 30       | 28              |
| 18            | 30       | 56              |
| 19            | 30       | 98              |
| 20            | 30       | 154             |
| 21            | 1        | 28              |
| 22            | 1        | 56              |
| 23            | 1        | 98              |
| 24            | 1        | 154             |
| 25            | 17       | 28              |
| 26            | 17       | 56              |
| 27            | 17       | 98              |
| 28            | 17       | 154             |
| 29            | 25       | 28              |
| 30            | 25       | 56              |
| 31            | 25       | 98              |
| 32            | 25       | 154             |
| 33            | 26       | 28              |
| 34            | 26       | 56              |
| 35            | 26       | 98              |
| 36            | 26       | 154             |
| 37            | 27       | 28              |
| 38            | 27       | 56              |
| 39            | 27       | 98              |
| 40            | 27       | 154             |

**Supplementary Table S3. *Actinidia deliciosa* fruit developmental stages sampled in 2009 harvest year, with relative Biologische Bundesantalt Bundessortenamt und Chemische Industrie (BBCH) scale stage and description (Richardson *et al.*, 2011). DAA, days after anthesis.**

| Fruit age (DAA) | BBCH stage | Description                                                            |
|-----------------|------------|------------------------------------------------------------------------|
| 14              | 70         | Fruit set                                                              |
| 28              | 72         | Fruit reached 20% of final weight                                      |
| 56              | 75         | 50% fruit growth; growth slowing, beginning of net starch accumulation |
| 98              | 78         | 80% fruit growth; net starch accumulation                              |
| 154             | 80         | Fruit mature, but unripe                                               |

**Supplementary Table S4. Enzyme extraction buffer composition.**

| <b>Compound</b>               | <b>Final concentration</b> |
|-------------------------------|----------------------------|
| Hepes/KOH, pH 7.5             | 250 mM                     |
| MgCl <sub>2</sub>             | 50 mM                      |
| EDTA                          | 5 mM                       |
| EGTA                          | 5 mM                       |
| Benzamidine                   | 5 mM                       |
| $\epsilon$ -aminocaproic acid | 5 mM                       |
| BSA                           | 1.25% (w/v)                |
| Phenylmethylsulfonyl fluoride | 1 mM                       |
| Leupeptin                     | 20 $\mu$ M                 |
| DTT                           | 0.5 mM                     |
| Glycerol                      | 20% (v/v)                  |
| Triton X-100                  | 1% (v/v)                   |

**Supplementary Table S5. Dilution of extraction buffer to tissue fresh weight (FW) used for each kiwifruit enzymatic assay.**

| Enzyme            | Optimal dilution<br>(Extraction buffer:FW) |
|-------------------|--------------------------------------------|
| AGPase            | 250                                        |
| Acid Invertase    | 1000                                       |
| Alanine AT        | 5000                                       |
| Aspartate AT      | 5000                                       |
| FK                | 500                                        |
| HK                | 500                                        |
| Glutamate DH      | 500                                        |
| Neutral Invertase | 500                                        |
| PGM               | 250                                        |
| PGI cytosolic     | 250                                        |
| PGI total         | 250                                        |
| Shikimate DH      | 250                                        |
| SPS               | 250                                        |
| SUSY              | 2000                                       |
| UGPase            | 2000                                       |

**Supplementary Table S6. Methods adopted for enzyme activity assays (Gibon *et al.*, 2004; Steinhauser *et al.*, 2010). DHAP, dihydroxyacetone phosphate.**

| Enzyme                       | Abbreviation | Type of assay    | Assay direction for bidirectional enzymes | Product determination                                                | Notes                                                                                                         | Reference                        |
|------------------------------|--------------|------------------|-------------------------------------------|----------------------------------------------------------------------|---------------------------------------------------------------------------------------------------------------|----------------------------------|
| Acid invertase               | AI           | stopped assay    |                                           | fluorimetry after the addition of Amplex Red™ (dihydroxyphenoxazine) | same method as NI but buffer pH was 5                                                                         | Gibon <i>et al.</i> (2004)       |
| ADPGlucose pyrophosphorylase | AGPase       | stopped assay    | via Glc-1-P formation                     | via a glycerol3P/DHAP cycling reaction                               |                                                                                                               | Gibon <i>et al.</i> (2004)       |
| Aspartate aminotransferase   | AST          | stopped assay    | via oxalacetate formation                 | via a NAD/NADH cycling reaction                                      |                                                                                                               | Gibon <i>et al.</i> (2004)       |
| Fructokinase                 | FK           | stopped assay    |                                           | via a NADP/NADPH cycling reaction                                    |                                                                                                               | Gibon <i>et al.</i> (2004)       |
| Glutamate dehydrogenase      | GLDH         | stopped assay    | via Glu formation                         | via a NAD/NADH cycling reaction                                      |                                                                                                               | Gibon <i>et al.</i> (2004)       |
| Hexokinase                   | HK           | stopped assay    |                                           | via a NADP/NADPH cycling reaction                                    |                                                                                                               | Gibon <i>et al.</i> (2004)       |
| Neutral invertase            | NI           | stopped assay    |                                           | fluorimetry after the addition of Amplex Red™ (dihydroxyphenoxazine) | same method as AI but buffer pH was 7                                                                         | Gibon <i>et al.</i> (2004)       |
| Phosphoglucose isomerase     | PGI          | continuous assay | via Glc-6-P formation                     |                                                                      | Total and cytosolic PGI were measured. Cytosolic PGI was assayed after heating the extract at 50°C for 15 min | Steinhauser <i>et al.</i> (2010) |
| Phosphoglucomutase           | PGM          | continuous assay | via Glc-6-P formation                     |                                                                      | Only total PGM was measured.                                                                                  | Steinhauser <i>et al.</i> (2010) |
| Shikimate dehydrogenase      | SDH          | stopped assay    | via 3-dehydroshikimate formation          | via a NADP/NADPH cycling reaction                                    |                                                                                                               | Gibon <i>et al.</i> (2004)       |
| Sucrose phosphate synthase   | SPS          | stopped assay    |                                           | via a glycerol3P/DHAP cycling reaction                               |                                                                                                               | Gibon <i>et al.</i> (2004)       |
| Sucrose synthase             | SUSY         | stopped assay    | via UDP-Glc formation                     | via a NADP/NADPH cycling reaction                                    |                                                                                                               | Gibon <i>et al.</i> (2004)       |
| UDPGlucose pyrophosphorylase | UGPase       | stopped assay    | via Glc-1-P formation                     | via a glycerol3P/DHAP cycling reaction                               |                                                                                                               | Gibon <i>et al.</i> (2004)       |

**Supplementary Table S7. List of primers used for transcript abundance analysis, with respective GenBank (GB) identification (ID). EF1 $\alpha$  and PP2A were used as housekeeping genes. All sequences reported in this paper have been submitted to GenBank. SPSA primer as per Fung et al. (2003). NA, not available.**

| GENE                          | ENZYME FAMILY                 | GB ID    | EST     | PRIMER CODE        | FORWARD                 | REVERSE                |
|-------------------------------|-------------------------------|----------|---------|--------------------|-------------------------|------------------------|
| <i>AMY1</i>                   | $\alpha$ -Amylase             | JX067525 | 1475696 | SN61+62            | GAATTGGCTCAAGTCCGAAA    | GGACGTGTTTTGCATGTAGTTC |
| <i>AMY2</i>                   | $\alpha$ -Amylase             | JX067526 | 1475697 | SN63+64            | AGGGAATTCCTCAGGAAGCTG   | CAAGAAAAGTGACAGCCCTTG  |
| <i>AMY3</i>                   | $\alpha$ -Amylase             | FG460641 | 244905  | SN65+66            | AATCACCGCTGTGCACAATA    | CCTTCCCTGGAAATGTGGAT   |
| <i>APL2</i>                   | ADPglucose Pyrophosphorylase  | FG456809 | 189962  | SN45+46            | AAACAGCCTCCGAAGTTTGA    | TTATGGCATCGACAATCCTG   |
| <i>APL4</i>                   | ADPglucose Pyrophosphorylase  | FG521835 | 311362  | SN47+48            | GTCATCGTGAACAAAGATGGTG  | TGATTGTGGCCTTCTCCAAT   |
| <i>APS1</i>                   | ADPglucose Pyrophosphorylase  | FG458669 | 192438  | SN39+40            | TGAGGGTGCAAGCTTACTTGT   | AATCTGGCACTGGCTTTTTG   |
| <i>BAM1</i>                   | $\beta$ -Amylase              | KC171741 | 435565  | SN83+84            | GAGACACCATTGTGGAATTCA   | CACTGAAAGGCTCCAATTCC   |
| <i>BAM2</i>                   | $\beta$ -Amylase              | FG410711 | 234964  | SN69+70            | GCAGGTTCTTTCTCAATTGGT   | GATAGCTTACAGCAATGCAA   |
| <i>BAM3</i>                   | $\beta$ -Amylase              | FG455287 | 239356  | SN71+72            | ACGACAAGTACATGAGGGCTTC  | TTGGTTATACTGGCCGAGT    |
| <i>BAM9</i>                   | $\beta$ -Amylase              | FG460922 | 197517  | SN73+74            | TGATCTTCCTCTTCTCGATGG   | TGATATGCCCGTGATAGTGG   |
| <i>DOF2</i>                   | DOF Transcription Factor      | JX067534 | 324501  | SN105+106          | GTCAACCAGCCCCGATATTT    | CGAGCTTTTGTGCTTTCGAC   |
| <i>EF1<math>\alpha</math></i> | Elongation Factor 1- $\alpha$ | FG418280 | 21826   | SN125+126          | GCACTGTCATTGATGCTCCT    | CCAGCTTCAAAAACCACCACT  |
| <i>FK4</i>                    | Fructokinase                  | FG521968 | 311495  | SN99+100           | CCAAGAGCTTTCATGGATCTG   | TCCACCATCTTGCACAAAAG   |
| <i>FK6</i>                    | Fructokinase                  | FG434733 | 78318   | SN101+102          | CTTATCAAGCAGGCGAGCAT    | GAAAGGACACAACCGCATTC   |
| <i>FK8</i>                    | Fructokinase                  | FG514153 | 323025  | SN103+104          | AGAGGTGGCTTGAGAACGAA    | AAACATCTTTCCTCCCTCA    |
| <i>HK3</i>                    | Hexokinase                    | FG521281 | 310807  | SN107+108          | CCTGGGTGAAATTGTAAGACG   | ATCTGGGGTCTCGAGAACAA   |
| <i>HKL1</i>                   | Hexokinase                    | JX067540 | 945716  | SN89+90            | TGATAATTGGGACGGGTACAA   | TGTTAATTACCATGCCTCCAGA |
| <i>INK</i>                    | Neutral Invertase             | JX067549 | 583622  | SN41+42            | TCGACACATTCGGACTCTT     | GCATCTCAAAGCCATGAAGAA  |
| <i>INV3</i>                   | Vacuolar Invertase            | FG438458 | 101593  | SN13+14            | TTCGATTCCAATGGTGTGTG    | GGTTTTGCACTTGACGTAA    |
| <i>PP2A</i>                   | Protein Phosphatase 2A        | FG522516 | 312205  | SN25+26            | GCAGCACATAATTCCACAGG    | TTTCTGAGCCCATAACAGGAG  |
| <i>SnRK1</i>                  | Sucrose non-Fermenting Kinase | JX067541 | 945651  | SN75+76            | TTCAGTCTCAAGCCCATCCT    | ACCCACCTGCATTTTCATGTT  |
| <i>SPSA</i>                   | Sucrose Phosphate Synthase    | AF318949 | NA      | Fung et al. (2003) | GAACCTAAAGTTTTCACTGGATG | CGGAGAGATCCGATATAGCACC |
| <i>SPT1</i>                   | Hexose Transporter            | JX067542 | 1475738 | SN93+94            | ACGTTGGTTTTCGATTTACGG   | CAGGCTGCAACTACAATCTGAC |
| <i>STP14</i>                  | Hexose Transporter            | FG528269 | 320319  | SN95+96            | GCTAGTTGTGGCAGCTTTGA    | CCACCGTTACATTGCACATT   |
| <i>SUC3</i>                   | Sucrose Transporter           | JX067543 | 583663  | SN77+78            | CTCTTACCTGGTTGTCTGCTGTT | ACTTGAGAGACATCCCCTTTTG |
| <i>SUC4</i>                   | Sucrose Transporter           | JX067544 | 583617  | SN79+80            | CAAGGCTTATCGATGGGTGT    | GCGAGTTACCACCACCAAAT   |
| <i>SUS1</i>                   | Sucrose Synthase              | FG404527 | 285852  | SN1+2              | ACCACTTTTCGTGCCAGTTC    | GTCCAACGGTGTCTTGCTT    |
| <i>SUS6</i>                   | Sucrose Synthase              | KC171739 | 583619  | SN81+82            | GAAGCAAGAATAGGCCTGGA    | CGGAGCAGCGATATTAAC     |
| <i>SUSA</i>                   | Sucrose synthase              | FG439911 | 100046  | SN3+4              | CTGCCGAATTACAGGGTGT     | GAGCAATGGTGCCTGTGTT    |



**Supplementary Table S8. Effects on correlation analyses of adjustment of critical significance thresholds for Pearson's correlation coefficients to control the False Discovery Rate (FDR). FDR critical values are calculated for each correlation matrix presented in the manuscript.**

|                                             | r values for $p < 0.05$                                            |                                                                   |                                                            |                                                           |                                                                |                                                               |                                                                        |                                                                       |                                                                       |                                                                     |                                                                   |                                                                  |
|---------------------------------------------|--------------------------------------------------------------------|-------------------------------------------------------------------|------------------------------------------------------------|-----------------------------------------------------------|----------------------------------------------------------------|---------------------------------------------------------------|------------------------------------------------------------------------|-----------------------------------------------------------------------|-----------------------------------------------------------------------|---------------------------------------------------------------------|-------------------------------------------------------------------|------------------------------------------------------------------|
|                                             | High starch<br>Metabolite-<br>Metabolite<br>correlation<br>Fig. 5A | Low starch<br>Metabolite-<br>Metabolite<br>correlation<br>Fig. 5B | High starch<br>Enzyme-<br>Enzyme<br>correlation<br>Fig. 6A | Low starch<br>Enzyme-<br>Enzyme<br>correlation<br>Fig. 6B | High starch<br>Metabolite-<br>Enzyme<br>correlation<br>Fig. 7A | Low starch<br>Metabolite-<br>Enzyme<br>correlation<br>Fig. 7B | High starch<br>Transcripts-<br>Transcripts<br>correlation<br>Fig. S15A | Low starch<br>Transcripts-<br>Transcripts<br>correlation<br>Fig. S15B | High starch<br>Metabolite-<br>Transcripts<br>correlation<br>Fig. S16A | Low starch<br>Metabolite-<br>Transcript<br>correlation<br>Fig. S16B | High starch<br>Enzyme-<br>Transcripts<br>correlation<br>Fig. S17A | Low starch<br>Enzyme-<br>Transcripts<br>correlation<br>Fig. S17B |
| Non-corrected critical value                | 0.64                                                               | 0.64                                                              | 0.64                                                       | 0.64                                                      | 0.64                                                           | 0.64                                                          | 0.64                                                                   | 0.64                                                                  | 0.64                                                                  | 0.64                                                                | 0.64                                                              | 0.64                                                             |
| FDR critical value                          | 0.82                                                               | 0.79                                                              | 0.70                                                       | 0.74                                                      | 0.82                                                           | 0.72                                                          | 0.88                                                                   | 0.83                                                                  | 0.94                                                                  | 0.92                                                                | n.s.                                                              | n.s.                                                             |
| Number of significant correlations          | 101                                                                | 193                                                               | 43                                                         | 66                                                        | 54                                                             | 260                                                           | 3                                                                      | 9                                                                     | 1                                                                     | 3                                                                   | 0                                                                 | 0                                                                |
| Number of positive significant correlations | 91                                                                 | 146                                                               | 43                                                         | 56                                                        | 53                                                             | 216                                                           | 2                                                                      | 9                                                                     | 1                                                                     | 1                                                                   | 0                                                                 | 0                                                                |
| Number of negative significant correlations | 10                                                                 | 47                                                                | 0                                                          | 10                                                        | 1                                                              | 44                                                            | 1                                                                      | 0                                                                     | 0                                                                     | 2                                                                   | 0                                                                 | 0                                                                |

## SUPPLEMENTARY FIGURES

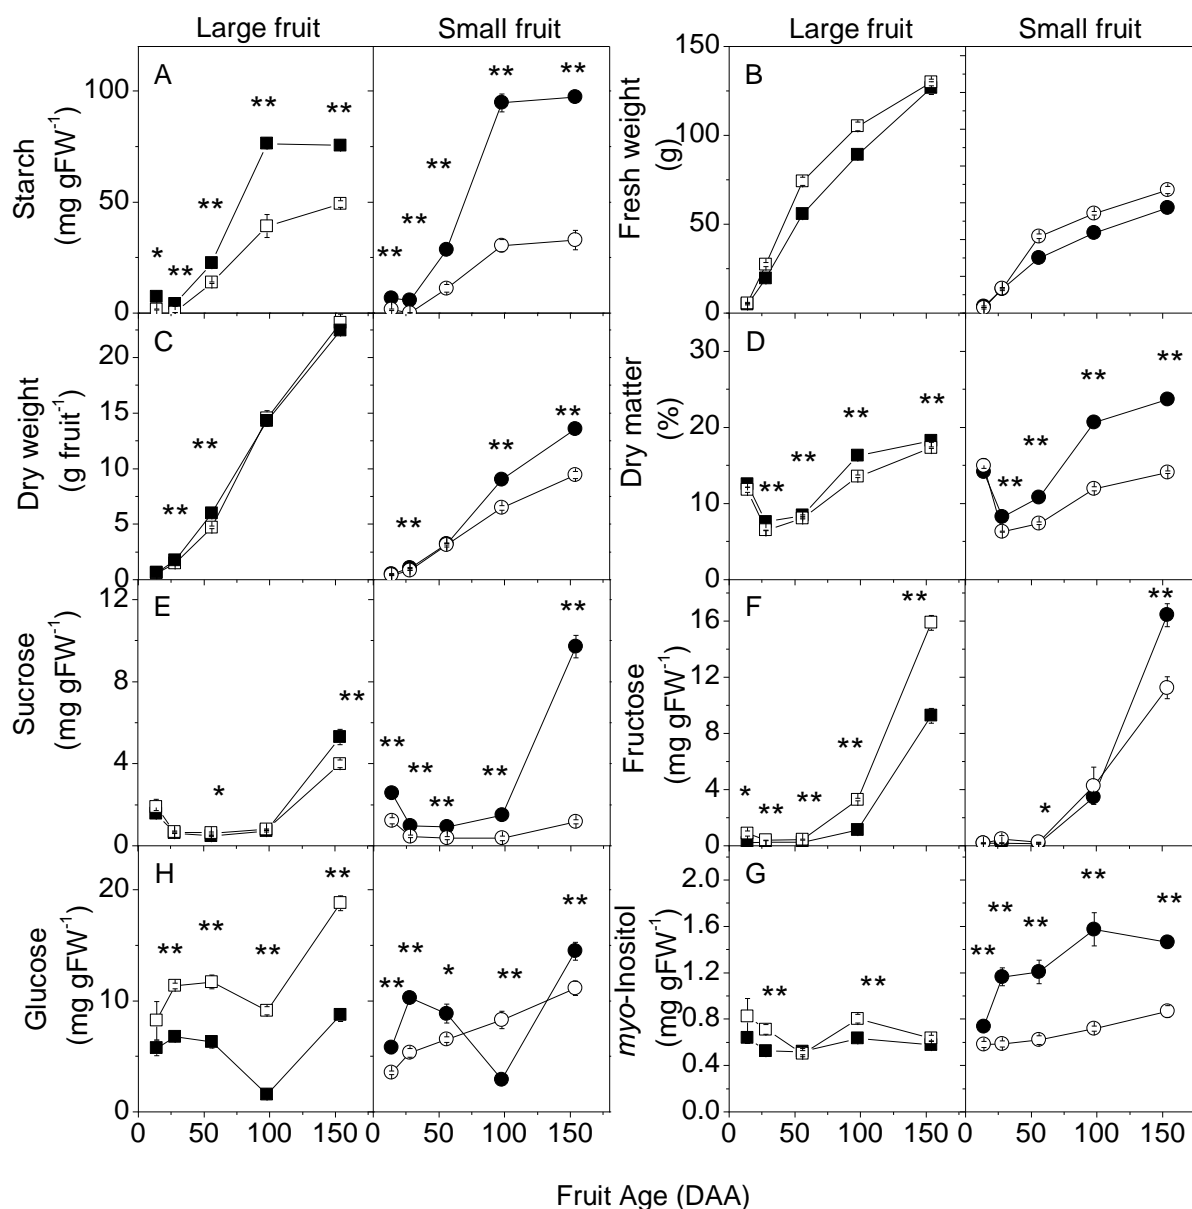

**Supplementary Fig. S1. Changes in starch (A), physical measurements (B, fresh weight; C, dry weight; D, dry matter), and Ion Chromatography quantified soluble sugars (E, Suc; F, Fru; G, Glc) and the sugar-alcohol *myo*-inositol (H) in the outer pericarp during fruit development of *Actinidia deliciosa* genotypes (2009 samples). Four genotypes were examined: Genotype 3, large fruit and high starch (G3, close square); Genotype 25, large fruit and low-starch (G25, open square); Genotype 30, small fruit and high starch (G30, close circle), Genotype 17, small fruit and low-starch (G17, open circle). For each developmental stage, *t*-test significance levels are reported: \*,  $p < 0.05$ ; \*\*,  $p < 0.01$ .**

**$p < 0.01$ ; \*\*\*,  $p < 0.001$ ; \*\*\*\*,  $p < 0.0001$ . Values are means of six biological replicates  $\pm$ SEM.**

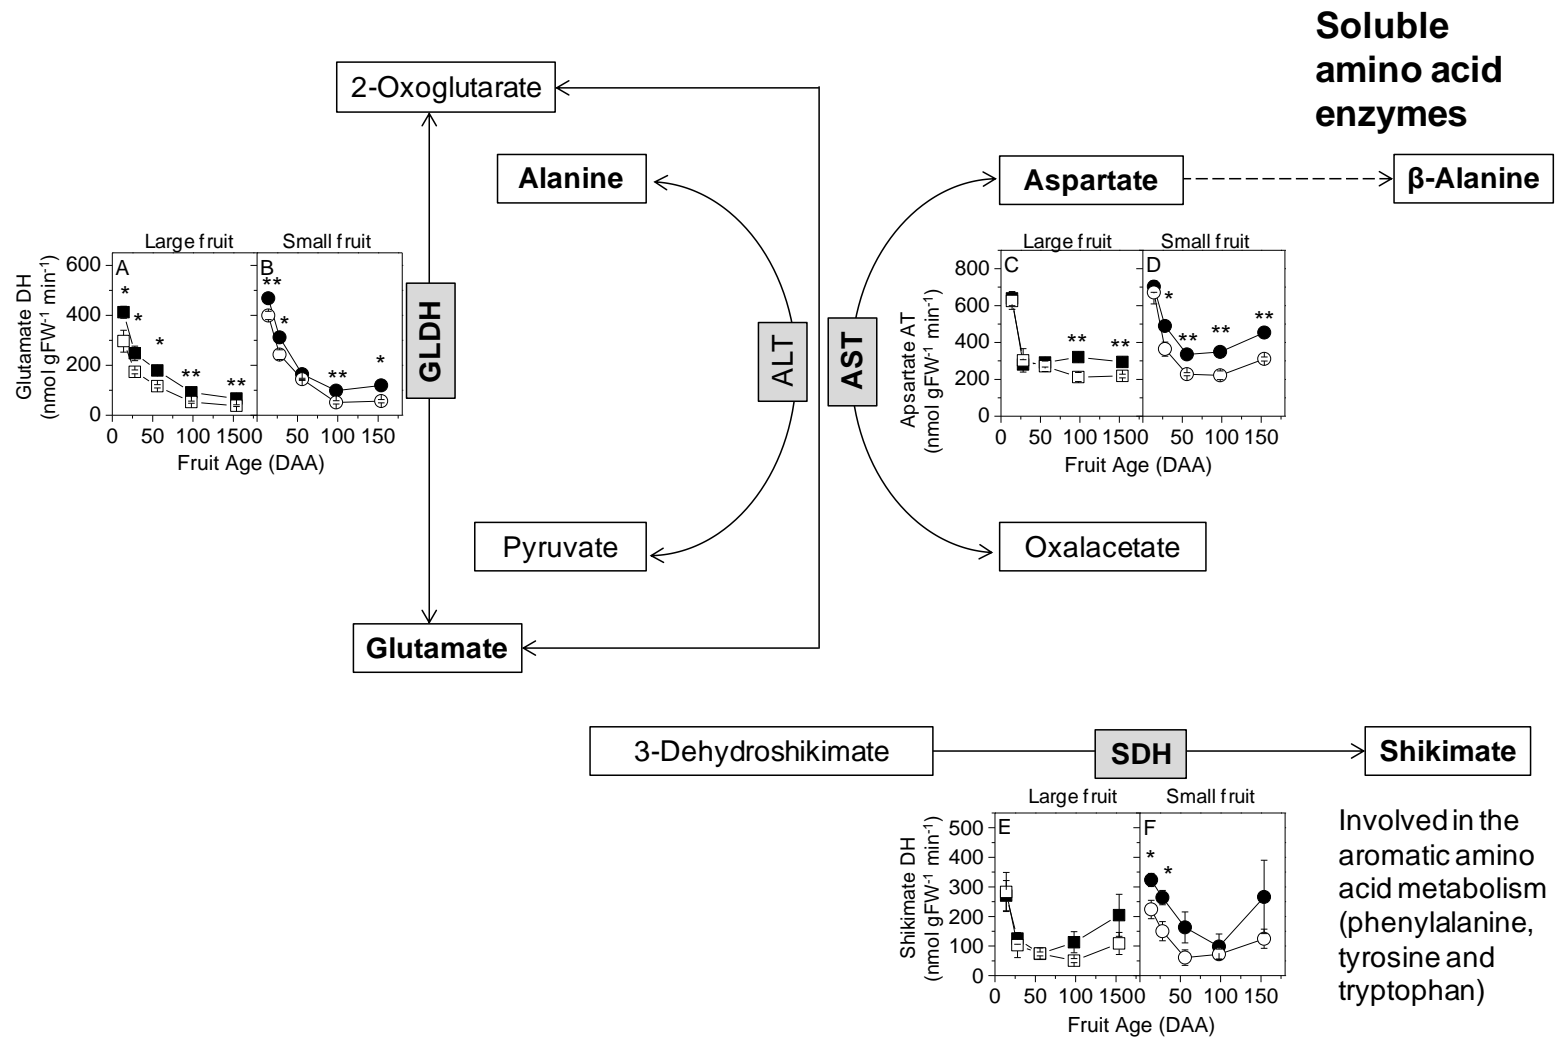

**Supplementary Fig. S2. Kiwifruit soluble enzyme activities associated with amino acid metabolism. The graph for each enzyme activity is placed in proximity to the enzyme in the simplified pathway chart: A-B, Glutamate dehydrogenase; C-D,**

Aspartate aminotransferase; E-F, Shikimate dehydrogenase. *t*-test significance levels are reported: \*,  $p < 0.05$ ; \*\*,  $p < 0.01$ . Where the symbol is missing, the difference is not statistically significant. Genotype codes: G3, (high-starch, large fruit; close square); G17, (low-starch, small fruit; open circle); G25, (low-starch, large fruit; open square); G30, (high-starch, small fruit; close circle). Enzyme codes: ALT, alanine aminotransferase; AST, aspartate aminotransferase; GLDH, glutamate dehydrogenase; SDH, shikimate dehydrogenase. Fruit age is in days after anthesis (DAA). Values are means of 4 biological replicates  $\pm$  SE of the mean. Data refer to 2009 outer pericarp samples. White boxes: metabolites; grey boxes: enzymes; bold text: measured metabolites.



**Data were normalised to the high-starch genotypes at 28 days after anthesis (DAA).**





squares were not statistically significant). The 51 metabolites identified by GC-TOF-MS were subdivided into the following classes: amino acids (Ala, Trp, Arg, Gly, Gln, Ile, Pro, Asp, Ser, Asn, Val, Met, Lys, Glu); non-protein amino acids and polyamine (putrescine,  $\beta$ -Ala, GABA); other organic acids (threonate, quinate, DHA, gluconate, ascorbate, glycerate, saccharate, 1,4-GL); organic acids in the TCA cycle (succinate, malate, citrate,  $\alpha$ -KG, fumarate); sugars (Glc, Fru, Suc, Gal, planteose, melibiose, Rha, Tre, Xyl, Fuc, raffinose); sugar-alcohols (*myo*-inositol, erythritol, galactinol); phosphate sugars (Glc6P, Fru6P); miscellaneous (phosphate, quinate 3-caffeoyl); other sugars ( $\alpha$ -methyl glucoside,  $\alpha$ -methyl mannoside, glucosamine). Starch (insoluble carbohydrates) and physical measurements (fresh weight and dry matter) were also analysed. DHA, dehydroascorbate; GABA,  $\gamma$ -aminobutyric acid; 1,4-GL, glucaric acid 1,4-lactone;  $\alpha$ -KG,  $\alpha$ -ketoglutarate. Data refer to 2009 outer pericarp samples.

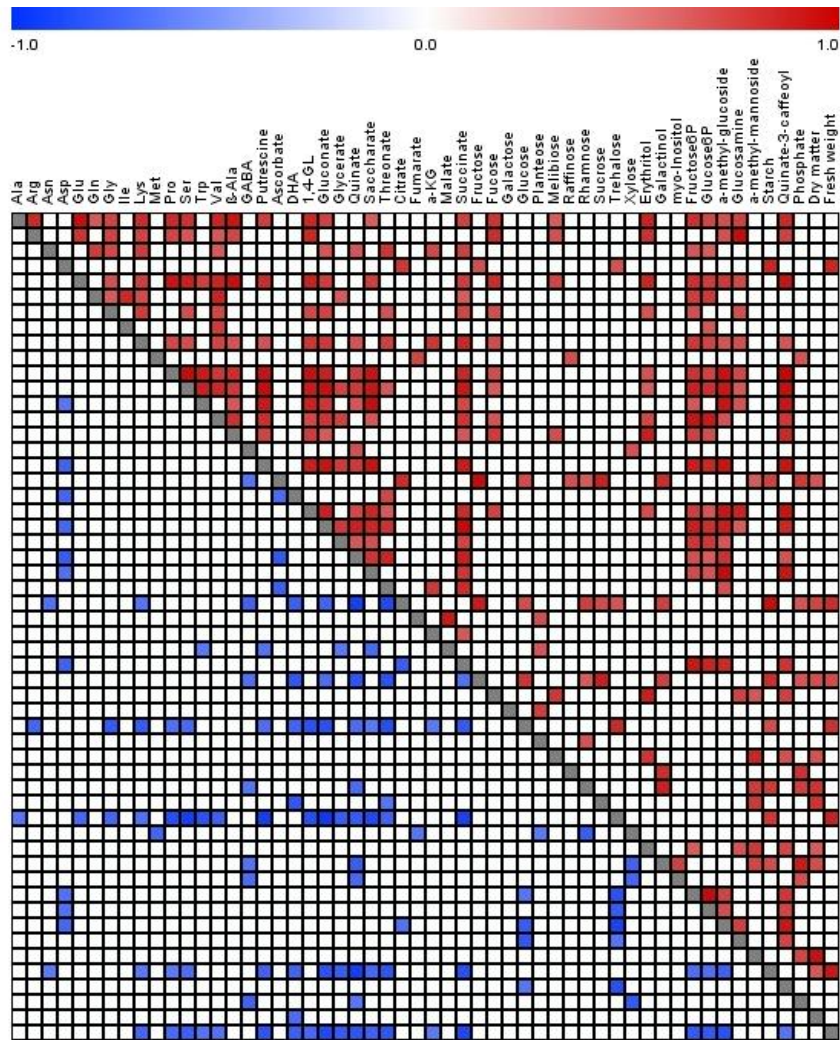

**B-Low Starch Genotypes**

- Ala
  - Arg
  - Asn
  - Asp
  - Glu
  - Gln
  - Gly
  - Ile
  - Lys
  - Met
  - Pro
  - Ser
  - Trp
  - Val
  - β-Ala
  - GABA
  - Putrescine
  - Ascorbate
  - DHA
  - 1,4-GL
  - Gluconate
  - Glycerate
  - Quinate
  - Saccharate
  - Threonate
  - Citrate
  - Fumarate
  - α-KG
  - Malate
  - Succinate
  - Fructose
  - Fucose
  - Galactose
  - Glucose
  - Plantose
  - Melibiose
  - Raffinose
  - Rhamnose
  - Sucrose
  - Trehalose
  - Xylose
  - Erythritol
  - Galactinol
  - myo-Inositol
  - FructoseBP
  - GlucoseBP
  - α-methyl-glucoside
  - Glucosamine
  - α-methyl-mannoside
  - Starch
  - Quinate-3-caffeoyl
  - Phosphate
  - Dry matter
  - Fresh weight
- Amino Acids**
  - Non-protein Amino Acids and Polyamine**
  - Other Organic Acids**
  - Organic Acids in TCA Cycle**
  - Sugars**
  - Sugar Alcohol**
  - Sugar Phosphates**
  - Other Sugars**
  - Insoluble Carbohydrates**
  - Miscellaneous**
  - Physical Measurements**

Supplementary Fig. S4. (Continued.)

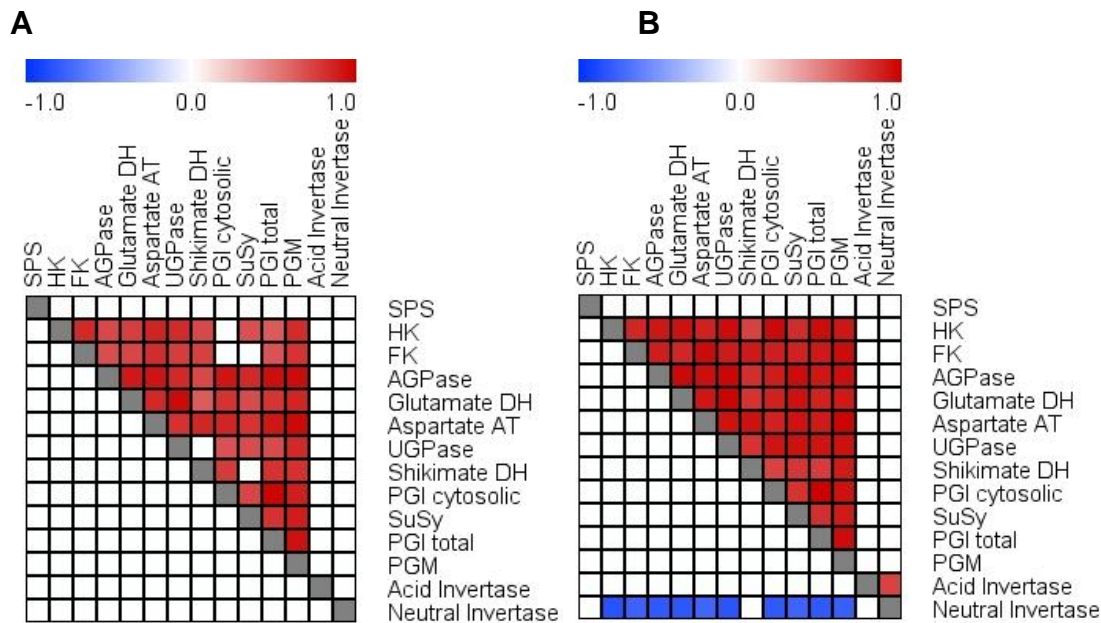

**Supplementary Fig. S5. Enzyme activity correlation matrix during fruit development of kiwifruit berries. A, high-starch genotypes (G3 and G30); B, low-starch genotypes (G25 and G17). The significance threshold of  $p < 0.05$  was used (white squares were not statistically significant). Enzyme codes: AGPase, ADP-glucose pyrophosphorylase; Aspartate AT, aspartate aminotransferase; FK, fructokinase; HK, hexokinase; Glutamate DH, glutamate dehydrogenase; PGM, phosphoglucomutase; PGI, phosphoglucose isomerase; shikimate DH, shikimate dehydrogenase; SPS, sucrose phosphate synthase; SuSy, sucrose synthase; UGPase, UDP-glucose pyrophosphorylase. Data refer to 2009 outer pericarp samples.**

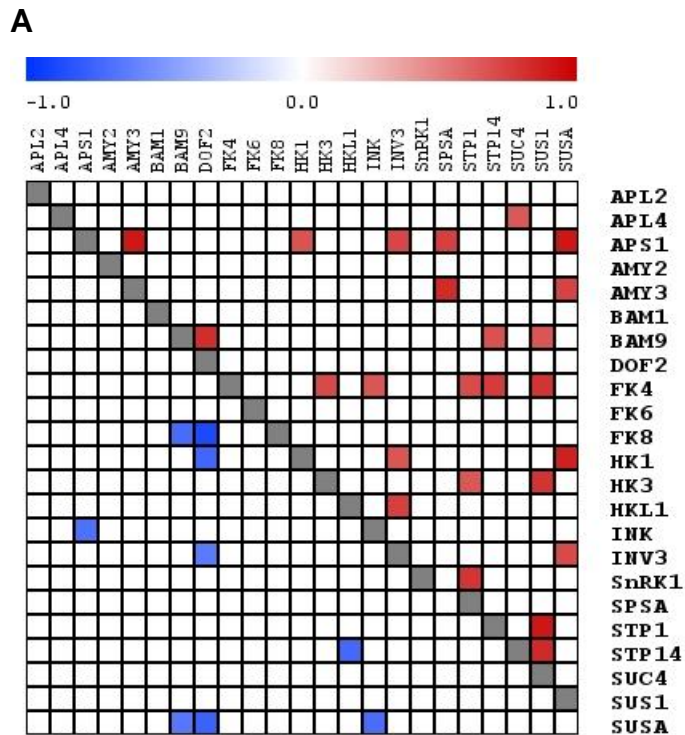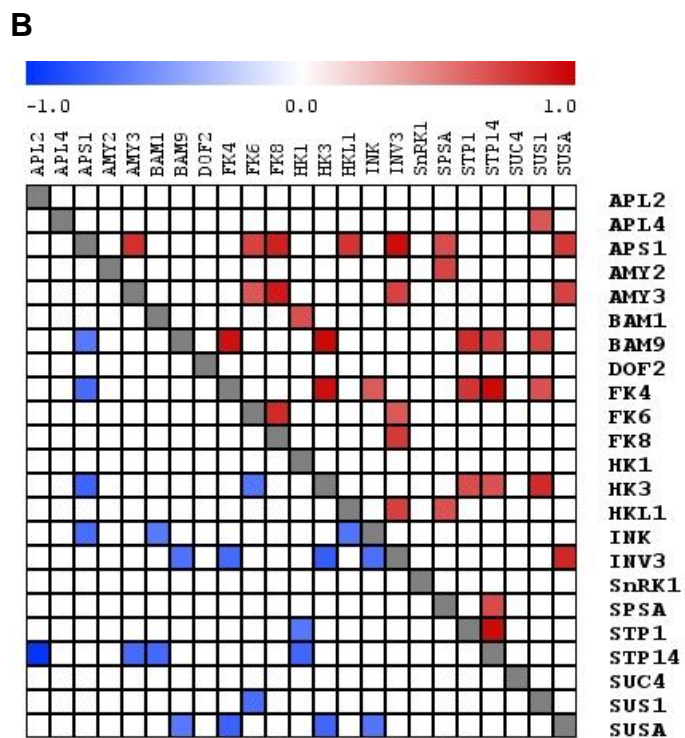

**Supplementary Fig. S6. Transcript correlations in fruit outer pericarp of *Actinidia deliciosa* genotypes (2009 samples): high-starch genotypes (A, genotype 3 and genotype 30) and low-starch genotypes (B, genotype 25 and genotype 17). Only significant correlations are shown ( $p < 0.05$ ). Gene codes: ADP-glucose pyrophosphorylases (*APL2*, *APL4* and *APS1*),  $\alpha$ -amylases (*AMY2* and *AMY3*),  $\beta$ -amylase (*BAM1* and *BAM9*), DOF zinc finger (*DOF2*),**

fructokinase (*FK4*, *FK6* and *FK8*), hexokinase (*HK3* and *HKL1*), neutral invertase (*INK*), vacuolar invertase (*INV3*), sucrose non-fermenting kinase (*SnRK1*), sucrose phosphate synthase (*SPSA*), monosaccharide transporter (*STP1* and *STP14*), sucrose transporter (*SUC4*) and sucrose synthase (*SUS1* and *SUSA*).

A

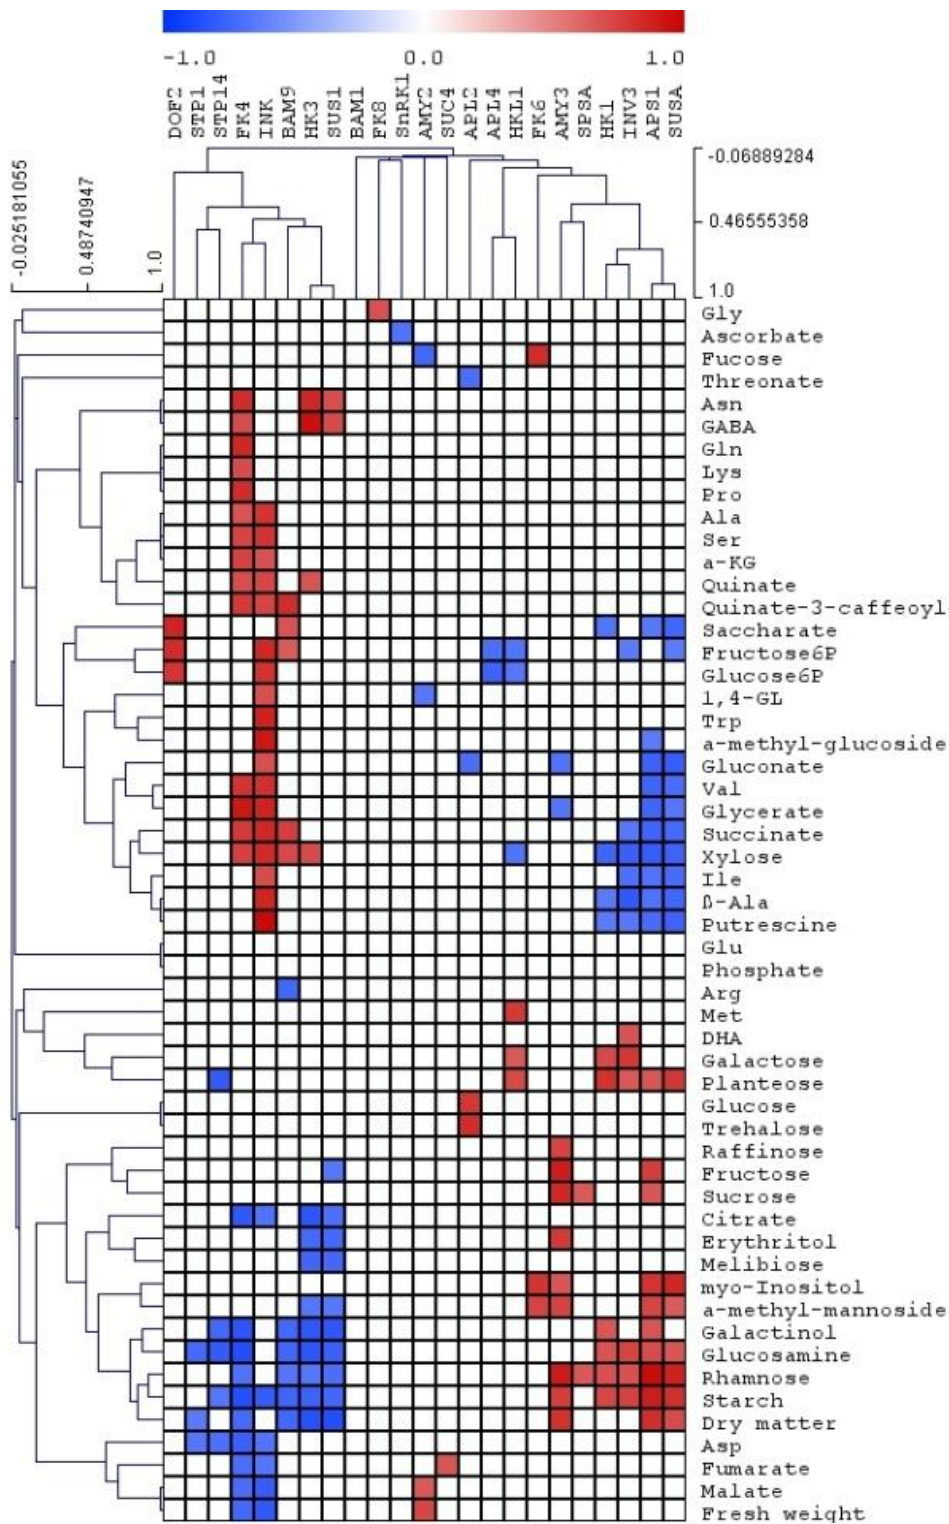

**Supplementary Fig. S7. Hierarchical cluster analysis of metabolite to transcript correlations in fruit outer pericarp of *Actinidia deliciosa* genotypes (2009 samples): high-starch genotypes (A, genotype 3 and genotype 30) low-starch genotypes (B, genotype 25 and genotype 17). Only significant correlations are shown ( $p < 0.05$ ). Gene codes: ADP-glucose pyrophosphorylases (*APL2*, *APL4***

and *APS1*),  $\alpha$ -amylases (*AMY2* and *AMY3*),  $\beta$ -amylase (*BAM1* and *BAM9*), DOF zinc finger (*DOF2*), fructokinase (*FK4*, *FK6* and *FK8*), hexokinase (*HK3* and *HKL1*), neutral invertase (*INK*), vacuolar invertase (*INV3*), sucrose non-fermenting kinase (*SnRK1*), sucrose phosphate synthase (*SPSA*), monosaccharide transporter (*STP1* and *STP14*), sucrose transporter (*SUC4*) and sucrose synthase (*SUS1* and *SUSA*). DHA, dehydroascorbate; GABA,  $\gamma$ -aminobutyric acid; 1,4-GL, glucaric acid 1,4-lactone;  $\alpha$ -KG,  $\alpha$ -ketoglutarate.

**B**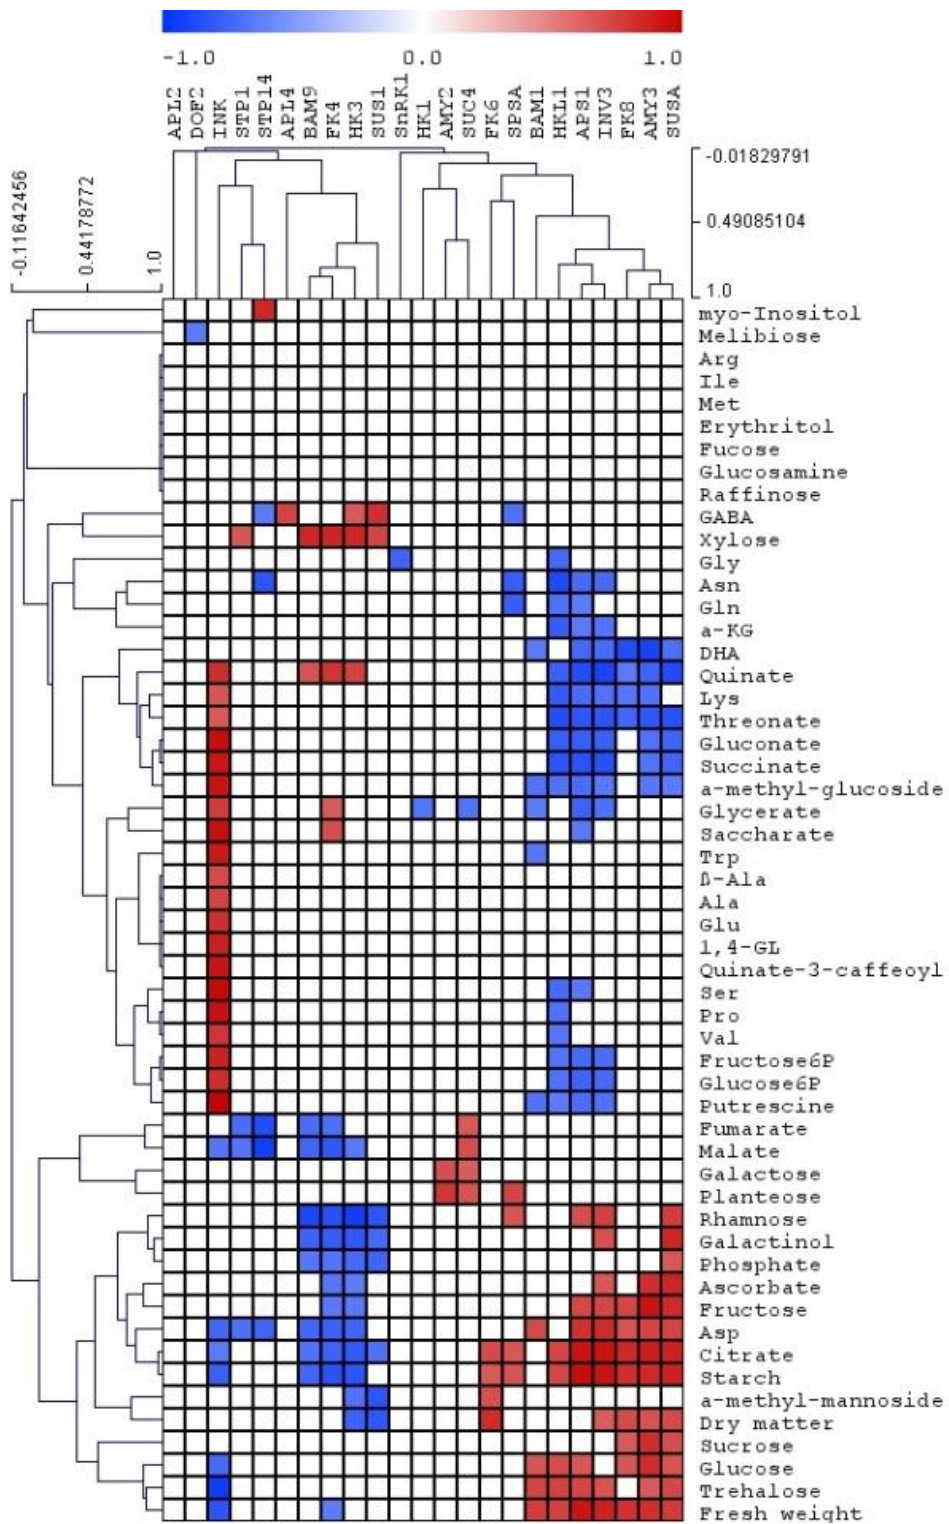**Supplementary Figure S7. (Continued.)**



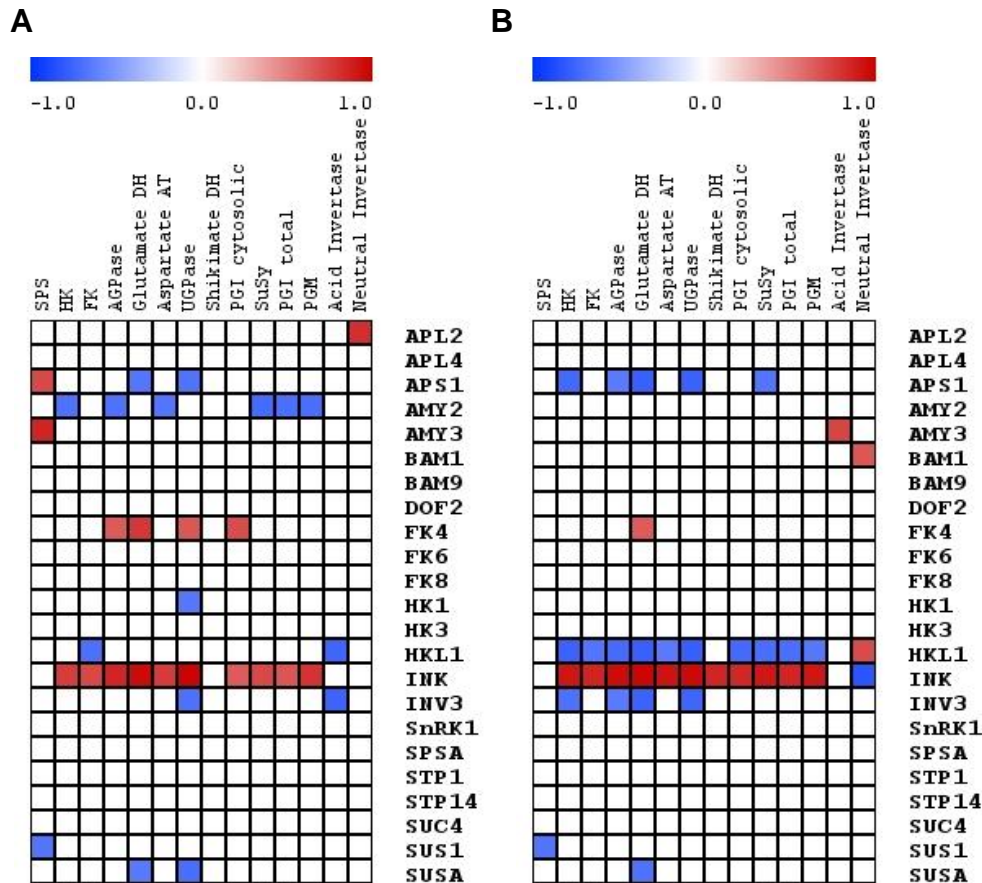

**Supplementary Fig. S8. Transcript to enzyme correlations in fruit outer pericarp of *Actinidia deliciosa* genotypes (2009 samples): high-starch genotypes (A, genotype 3 and genotype 30) low-starch genotypes (B, genotype 25 and genotype 17). Only significant correlations are shown ( $p < 0.05$ ). Gene codes: ADP-glucose pyrophosphorylases (*APL2*, *APL4* and *APS1*),  $\alpha$ -amylases (*AMY2* and *AMY3*),  $\beta$ -amylase (*BAM1* and *BAM9*), DOF zinc finger (*DOF2*), fructokinase (*FK4*, *FK6* and *FK8*), hexokinase (*HK3* and *HKL1*), neutral invertase (*INK*), vacuolar invertase (*INV3*), sucrose non-fermenting kinase (*SnRK1*), sucrose phosphate synthase (*SPSA*), monosaccharide transporter (*STP1* and *STP14*), sucrose transporter (*SUC4*) and sucrose synthase (*SUS1* and *SUSA*). Enzyme codes: AGPase, ADP-glucose pyrophosphorylase; Aspartate AT, aspartate aminotransferase; FruK, fructokinase; HK, hexokinase; Glutamate DH, glutamate dehydrogenase; PGM, phosphoglucomutase; PGI, phosphoglucose isomerase; shikimate DH, shikimate dehydrogenase; SPS, sucrose phosphate synthase; SuSy, sucrose synthase; UGPase, UDPglucose pyrophosphorylase.**

## References

- Fung RWM, Langenkämper G, Gardner RC, MacRae E. 2003. Differential expression within an SPS gene family. *Plant Science* 164, 459-470.
- Gibon Y, Blaesing OE, Hannemann J et al. 2004. A robot-based platform to measure multiple enzyme activities in *Arabidopsis* using a set of cycling assays: comparison of changes of enzyme activities and transcript levels during diurnal cycles and in prolonged darkness. *Plant Cell* 16, 3304-3325.
- Nardozza S, Boldingh HL, Richardson AC, Costa G, Marsh H, MacRae EA, Clearwater MJ. 2010. Variation in carbon content and size in developing fruit of *Actinidia deliciosa* genotypes. *Functional Plant Biology* 37, 545–554.
- Richardson A, Boldingh H, McAtee P, Gunaseelan K, Luo Z, Atkinson R, David K, Burdon J, Schaffer R. 2011. Fruit development of the diploid kiwifruit, *Actinidia chinensis* 'Hort16A'. *BMC Plant Biology* 11, 182.
- Steinhauser M-C, Steinhauser D, Koehl K, Carrari F, Gibon Y, Fernie AR, Stitt M. 2010. Enzyme activity profiles during fruit development in tomato cultivars and *Solanum pennellii*. *Plant Physiology* 153, 80-98.
